# Supplementary material for: Behavioral Activation through Virtual Reality for Depression: A Single Case Experimental Design with Multiple Baselines
Source: MDPI journal article supplement (doi:10.3390/jcm11051262), 2022-02-25
Supplement: s1 [file s1]

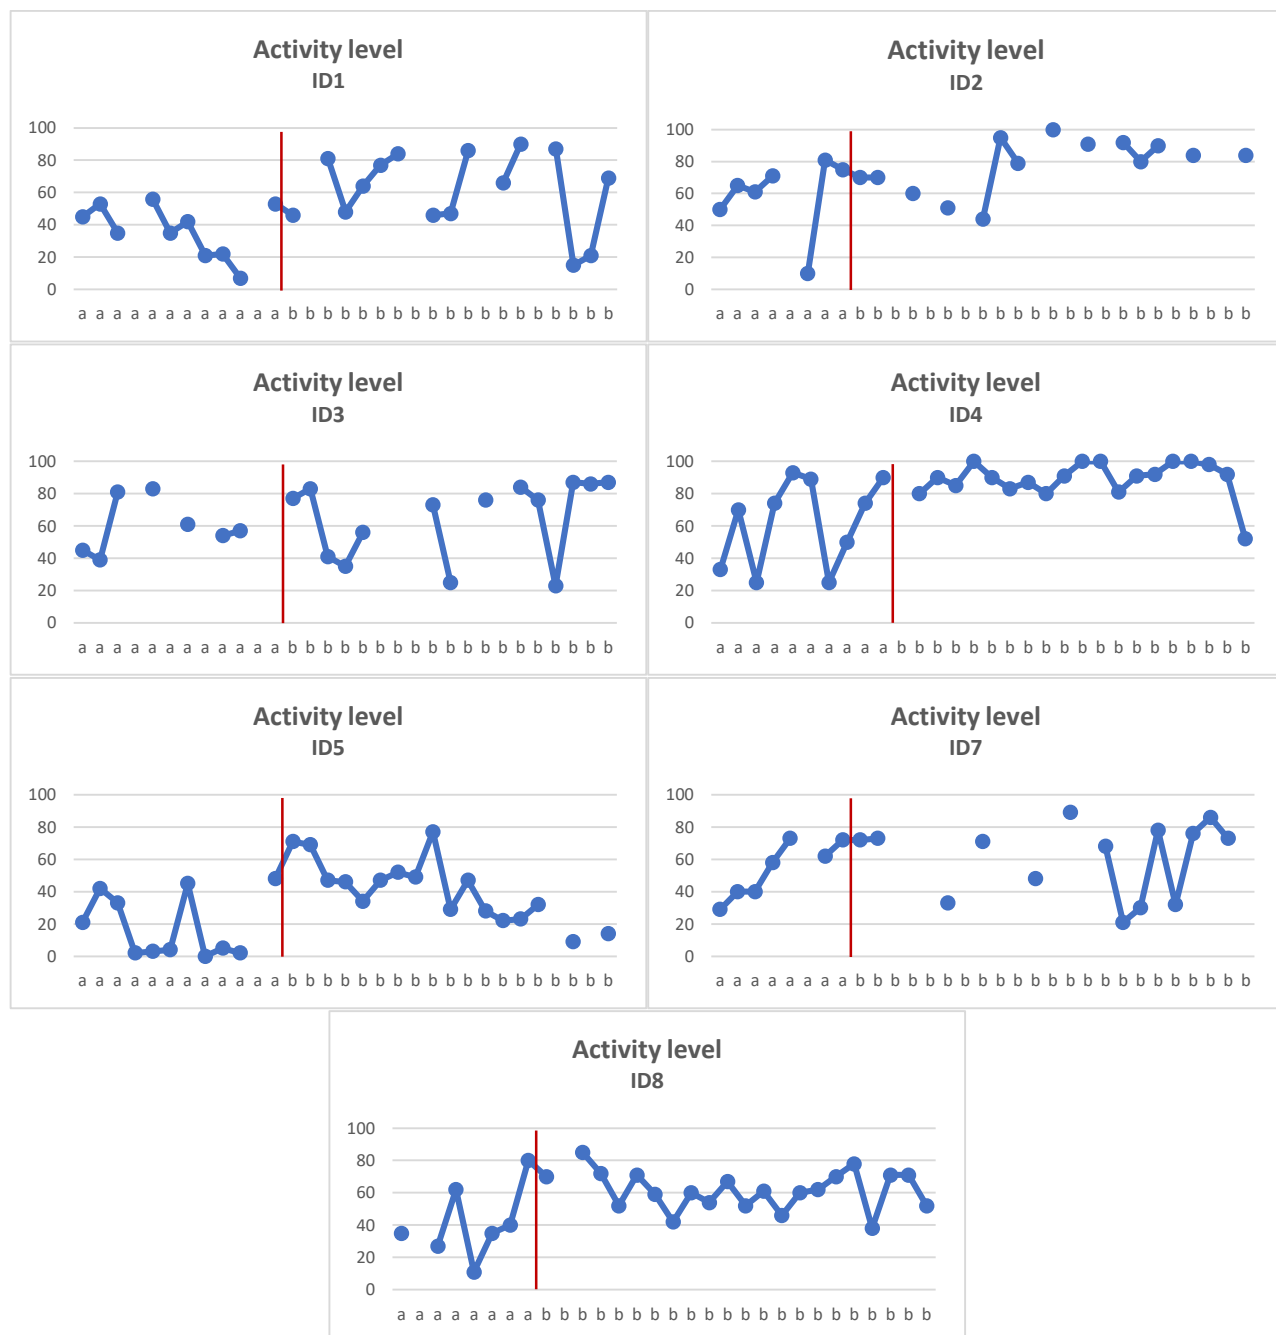

**Figure S1. Activity level outcome graph:** Visual inspection of patients' activity level measured through a 0-100 scale. a=baseline; b=intervention

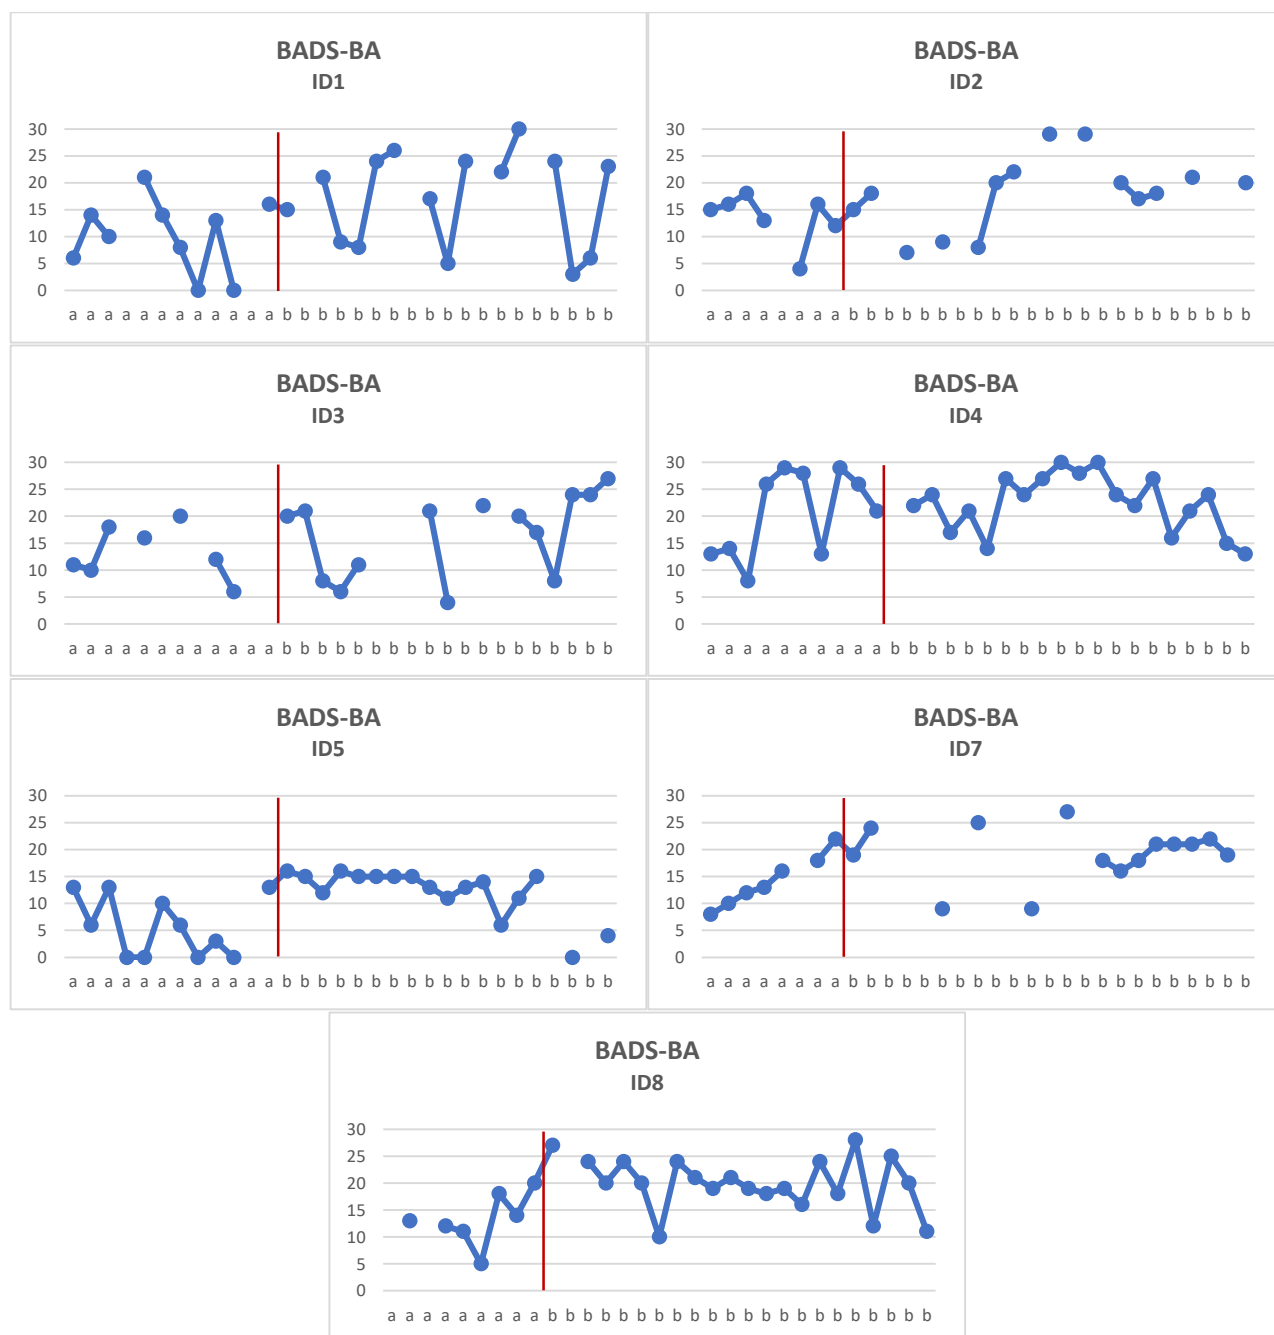

**Figure S2. BADS-BA outcome graph:** Visual inspection of patients' behavioral activation level measured through the Behavioral Activation for Depression Scale – Behavioral Activation subscale (BADS-BA).  
a=baseline; b=intervention

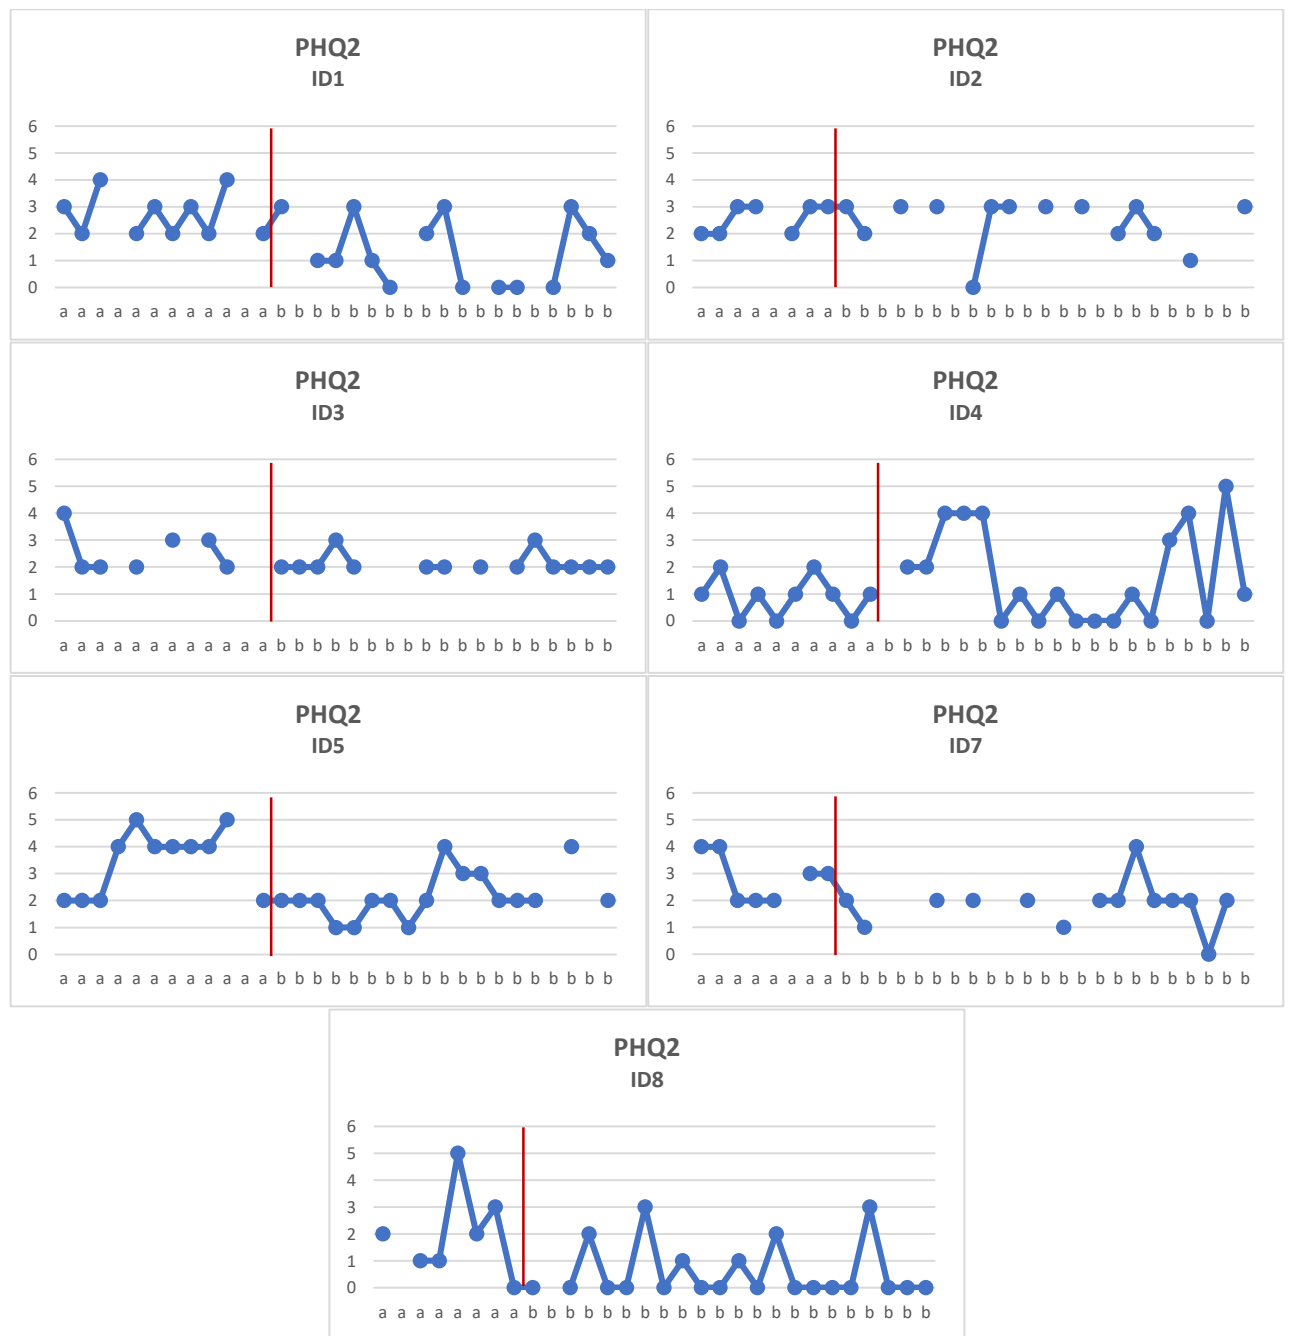

**Figure S3. PHQ2 outcome graph:** Visual inspection of patients' depressive symptoms measured through the Patient Health Questionnaire-2 (PHQ2).  
a=baseline; b=intervention

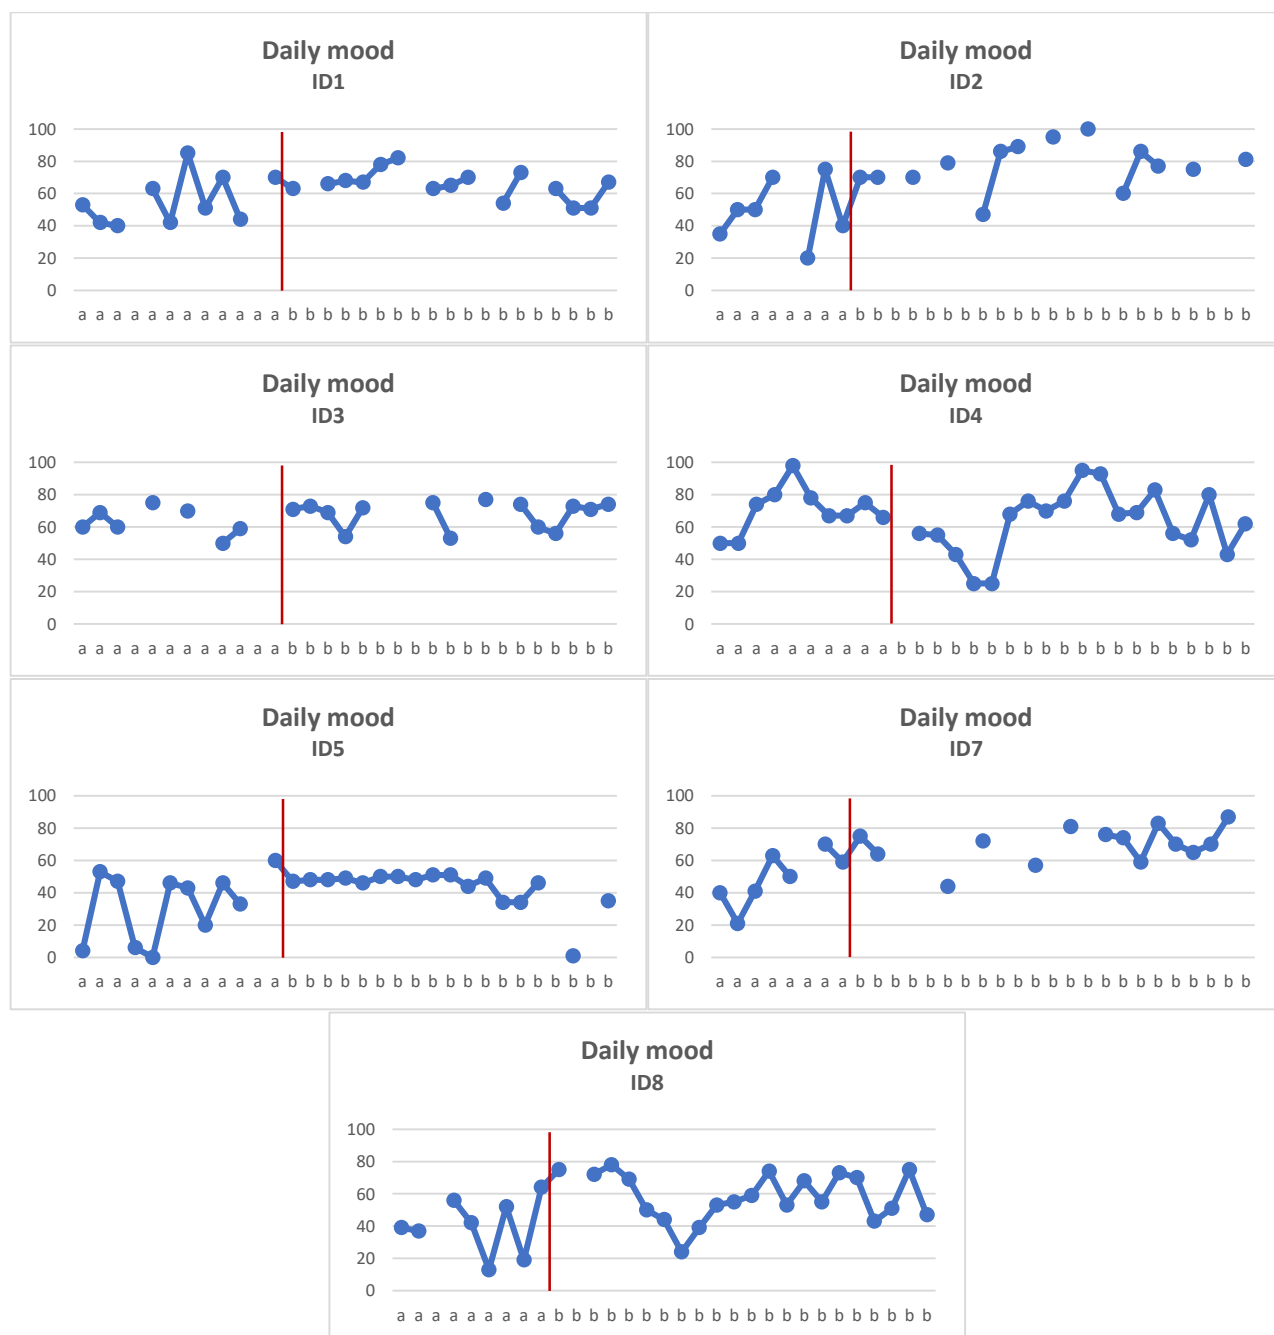

**Figure S4. Daily mood outcome graph:** Visual inspection of patients' daily mood measured through a 0-100 scale. a=baseline; b=intervention

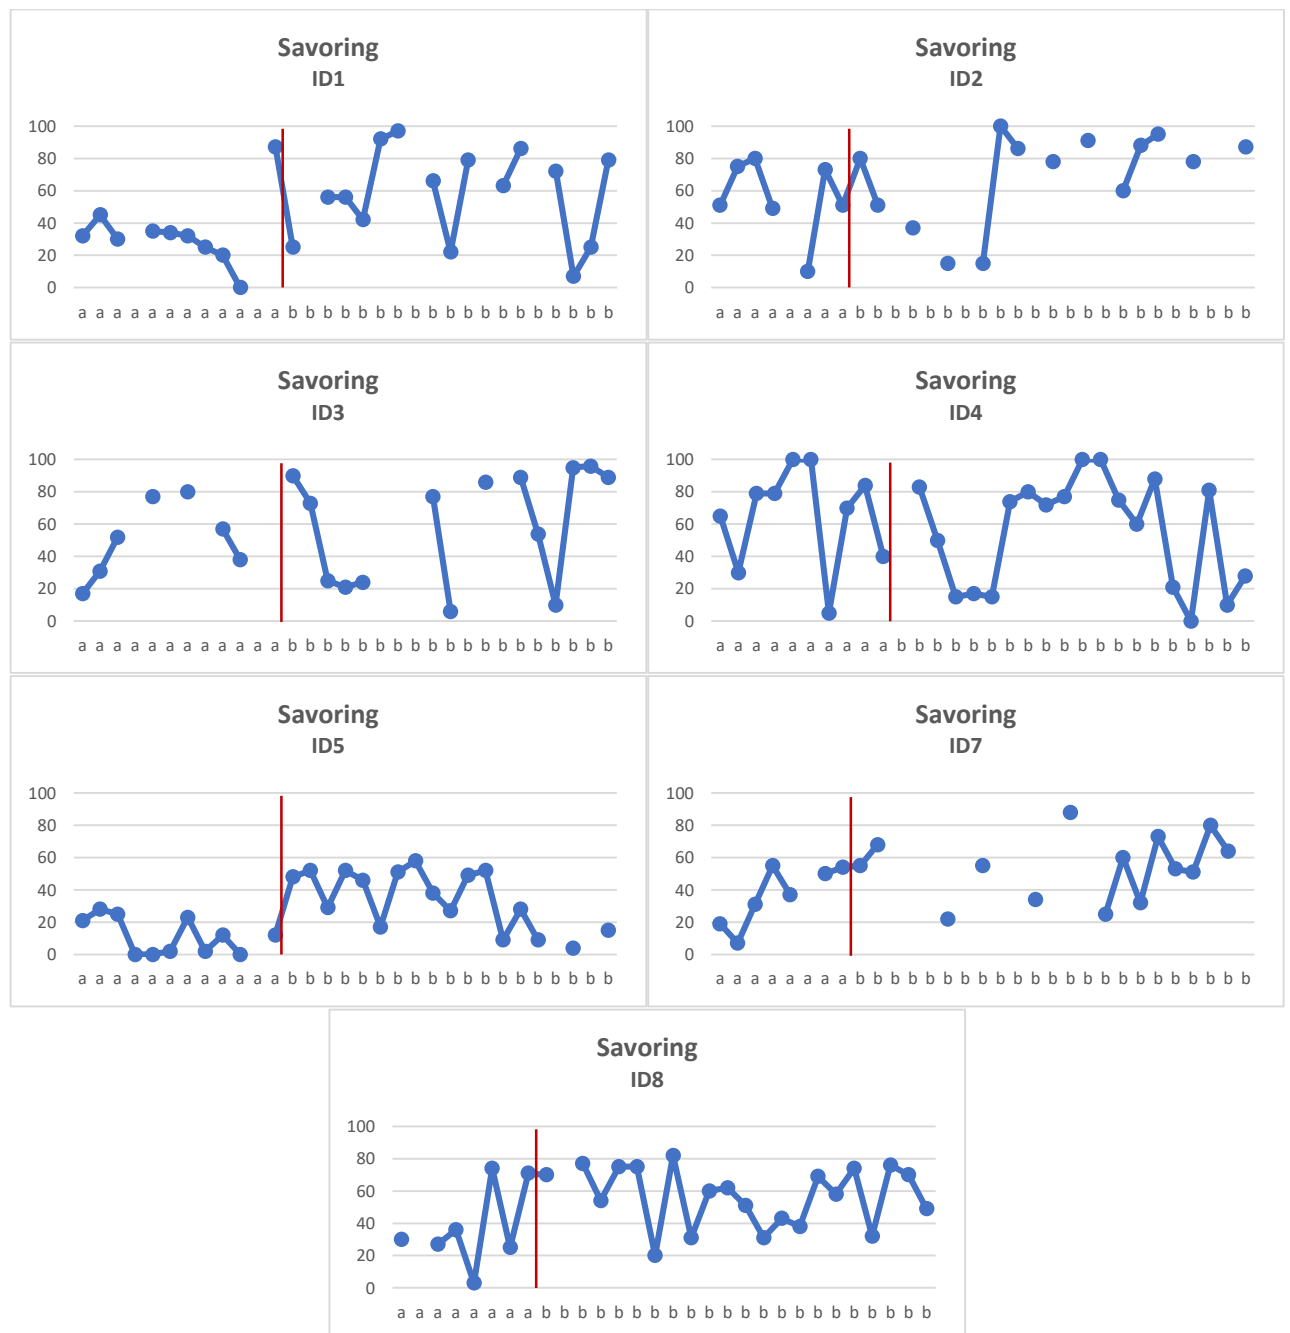

**Figure S5. Savoring outcome graph:** Visual inspection of patients' daily savoring measured through a 0-100 scale. a=baseline; b=intervention
